# Supplementary material for: Thermal and electrical wavelength tuning of Bragg reflection with ultraviolet light absorbers in polymer-stabilized cholesteric liquid crystals
Source: Royal Society of Chemistry journal article supplement (doi:10.1039/c8tc04563a), 2018-01-01
Supplement: c8tc04563a1.pdf [file c8tc04563a1.pdf]

## Supporting Information

# **Thermal and electrical tuning of Bragg reflection wavelength with ultraviolet light absorbers in polymer-stabilized cholesteric liquid crystals**

Amid Ranjkesh, Tae-Hoon Yoon<sup>\*</sup>

*Department of Electronics Engineering, Pusan National University, Busan 46241, Korea*

<sup>\*</sup> Corresponding Author

Tae-Hoon Yoon

Tel: +82-51-510-2379

Fax: +82-51-515-5190

E-mail: [thyoona@pusan.ac.kr](mailto:thyoona@pusan.ac.kr)

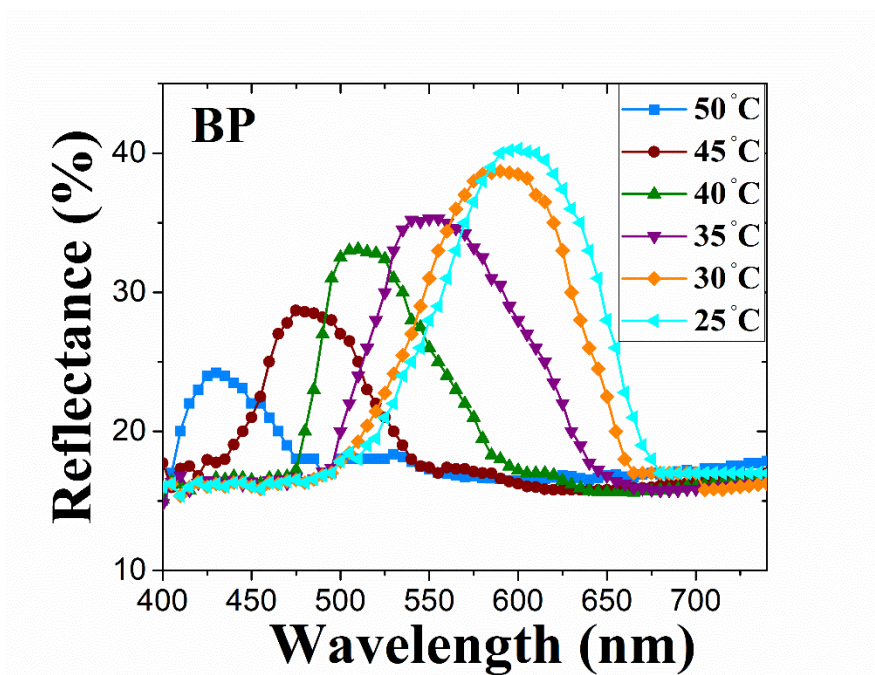

**Fig S1** Reflection spectra of the cell with respect to the temperature for the BP-type of UV light absorber on cooling form at the UV intensity of  $1 \text{ mW/Cm}^2$  and concentration of 3 wt %.

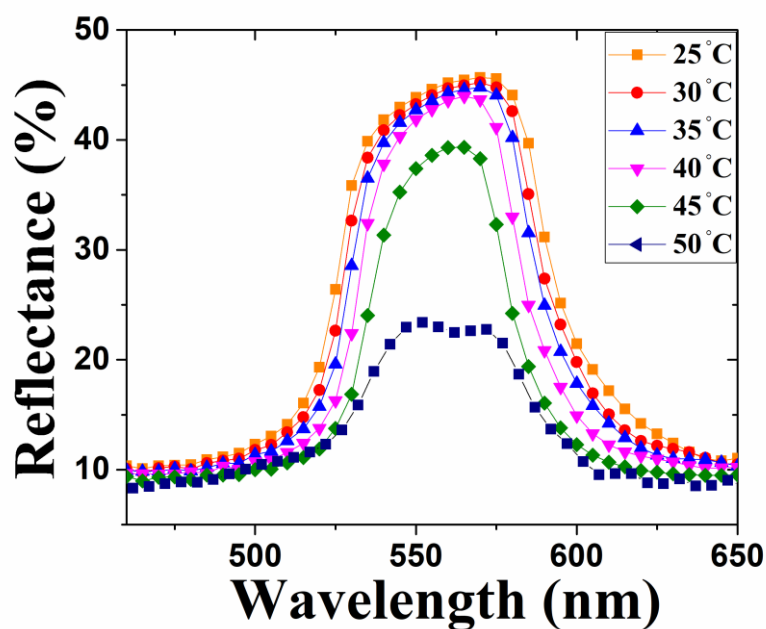

**Fig S2.** Reflection spectra of the cell with respect to the temperature for uniformly distributed polymer stabilized refractor by excluding the UV light absorber and in the high UV intensity of  $20 \text{ mW/Cm}^2$ .

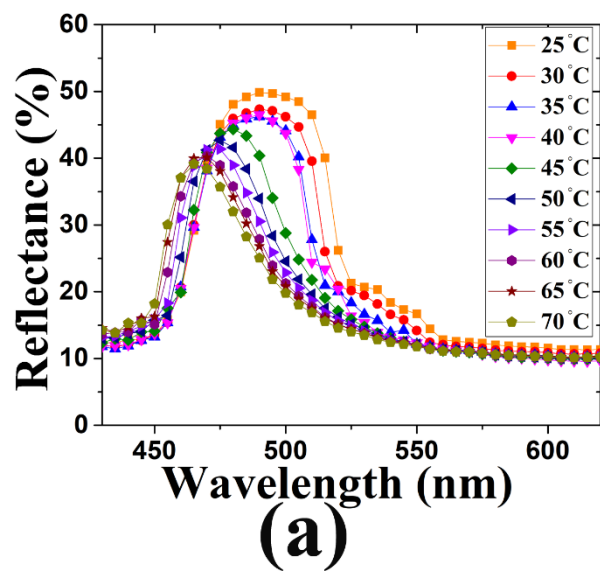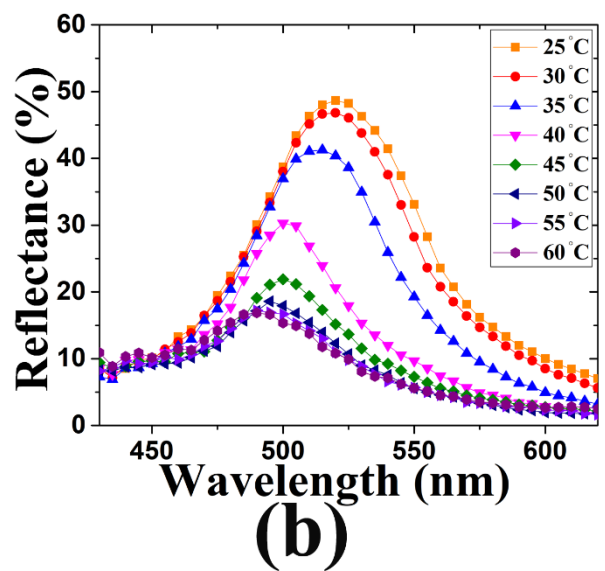

**Fig S3.** Reflection spectra of the cell with respect to the temperature of (a) BTZ and (b) HPT types of UV light absorbers at concentration of 3wt% and UV intensity of 10.2 mW/Cm<sup>2</sup>.
